# Supplementary material for: Serum Prolactin Levels in Patients with Major Depressive Disorder Receiving Selective Serotonin-Reuptake Inhibitor Monotherapy for 3 Months: A Prospective Study
Source: PubMed Central journal article supplement — Psychiatry Investig. 2017 May 16;14(3):368–71. doi: 10.4306/pi.2017.14.3.368 (PMC5440440; doi:10.4306/pi.2017.14.3.368), 2017-05-16
Supplement: pi-14-368-s002.pdf [file pi-14-368-s002.pdf]

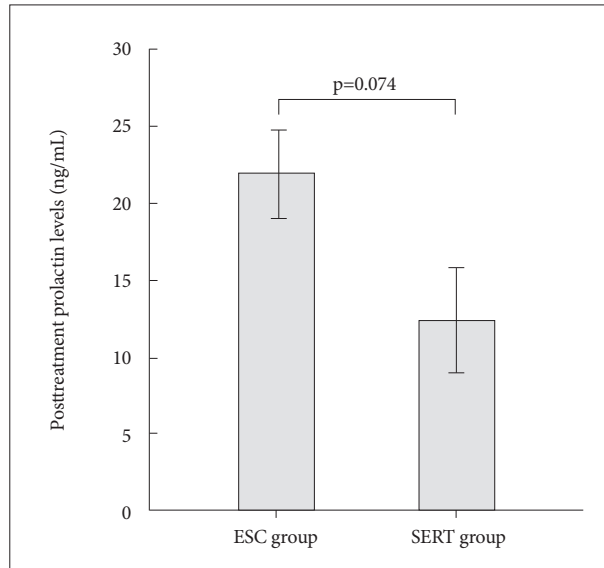

**Supplementary Figure 2.** Comparison of posttreatment prolactin levels between the ESC and SERT groups. ESC: escitalopram, SERT: sertraline.
